# Supplementary material for: On the trade-off between processability and opto-electronic properties of single wall carbon nanotube derivatives in thin film heterojunctions
Source: Royal Society of Chemistry journal article supplement (doi:10.1039/c4tc01350f), 2014-10-28
Supplement: c4tc01350f1.pdf [file c4tc01350f1.pdf]

## Supporting Information

### **On the trade-off between processability and opto-electronic properties of single wall carbon nanotube derivatives *in thin film heterojunctions***

*Patrizio Salice,<sup>a</sup> Camillo Sartorio,<sup>b</sup> Alessandro Burlini,<sup>a</sup> Roberto Improta,<sup>c</sup> Bruno Pignataro,<sup>\*b</sup> and Enzo Menna<sup>\*a</sup>*

<sup>a</sup>Università di Padova, Dipartimento di Scienze Chimiche, via Marzolo, 1 35131, Padova, Italy. E-mail: enzo.menna@unipd.it; Tel: + 39 0498275660

<sup>b</sup>Università di Palermo, Dipartimento di Fisica e Chimica, V.le delle Scienze, Parco d'Orleans II, 90128, Palermo, Italy. Email: bruno.pignataro@unipa.it; Tel: +39 09123897983

<sup>c</sup>Consiglio Nazionale delle Ricerche, Istituto di Biostrutture e Bioimmagini (IBB-CNR), Via Mezzocannone 16, I-80136, Napoli, Italy

|                                                    |         |
|----------------------------------------------------|---------|
| 1. <sup>1</sup> H- and <sup>13</sup> C-NMR spectra | page S2 |
| 2. DSC thermograms                                 | page S6 |
| 3. DLS analysis                                    | page S8 |
| 4. Raman spectra                                   | page S9 |

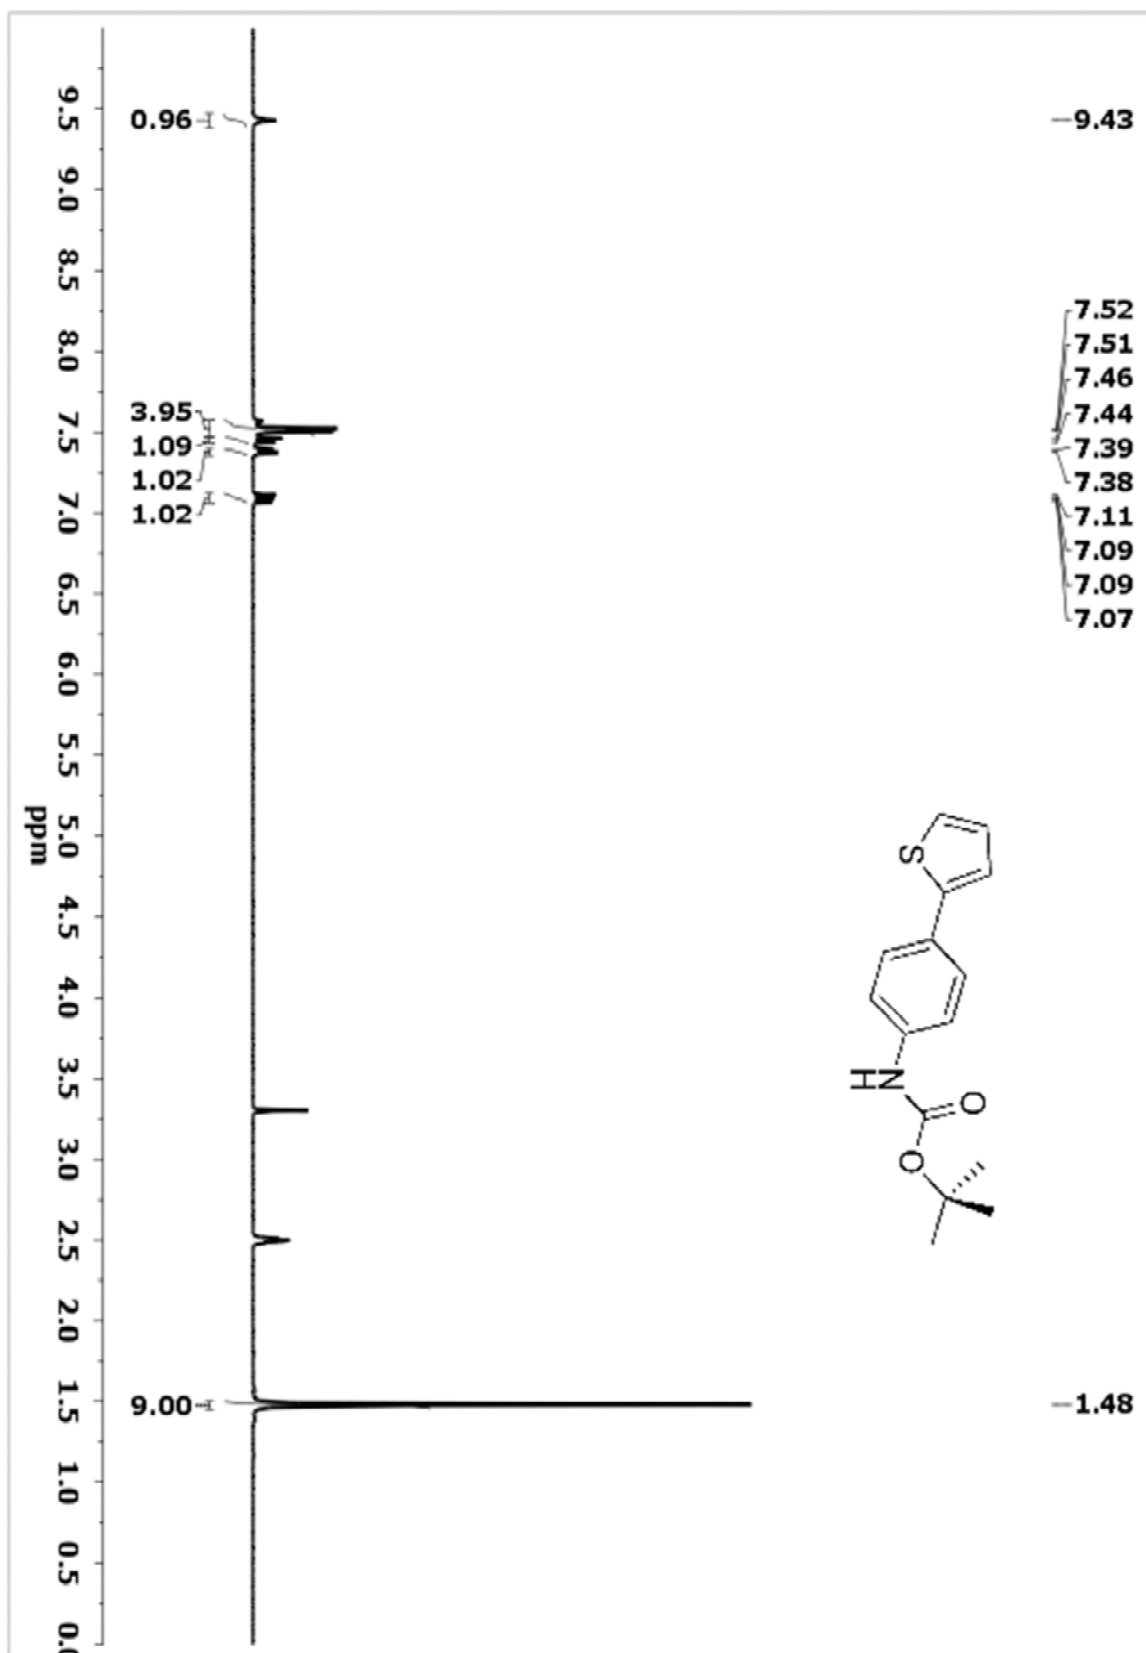

Figure S1: <sup>1</sup>H-NMR spectrum of *tert*-butyl (4-(thiophen-2-yl)phenyl)carbamate (**1**) (200 MHz, DMSO-d<sub>6</sub>).

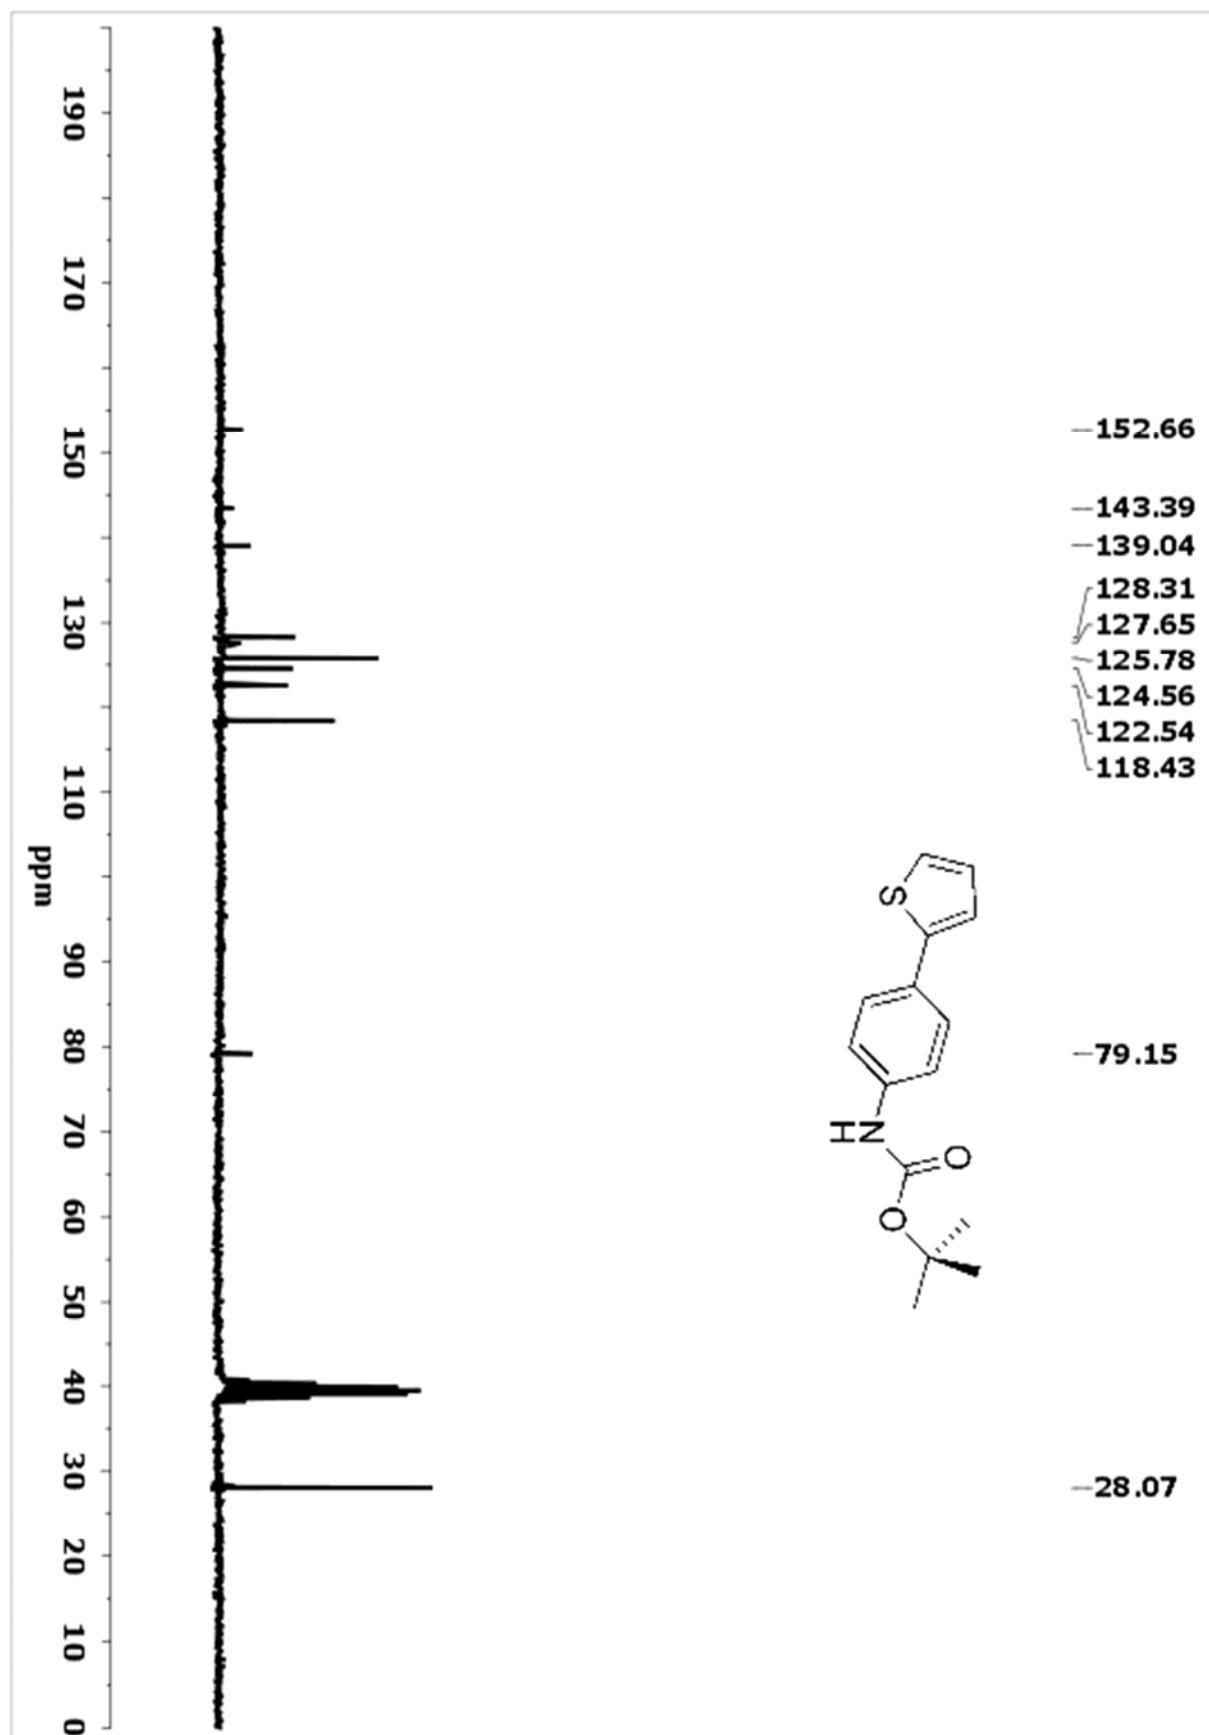

Figure S2:  $^{13}\text{C}$ -NMR spectrum of *tert*-butyl (4-(thiophen-2-yl)phenyl)carbamate (1) (50 MHz,  $\text{DMSO-d}_6$ ).

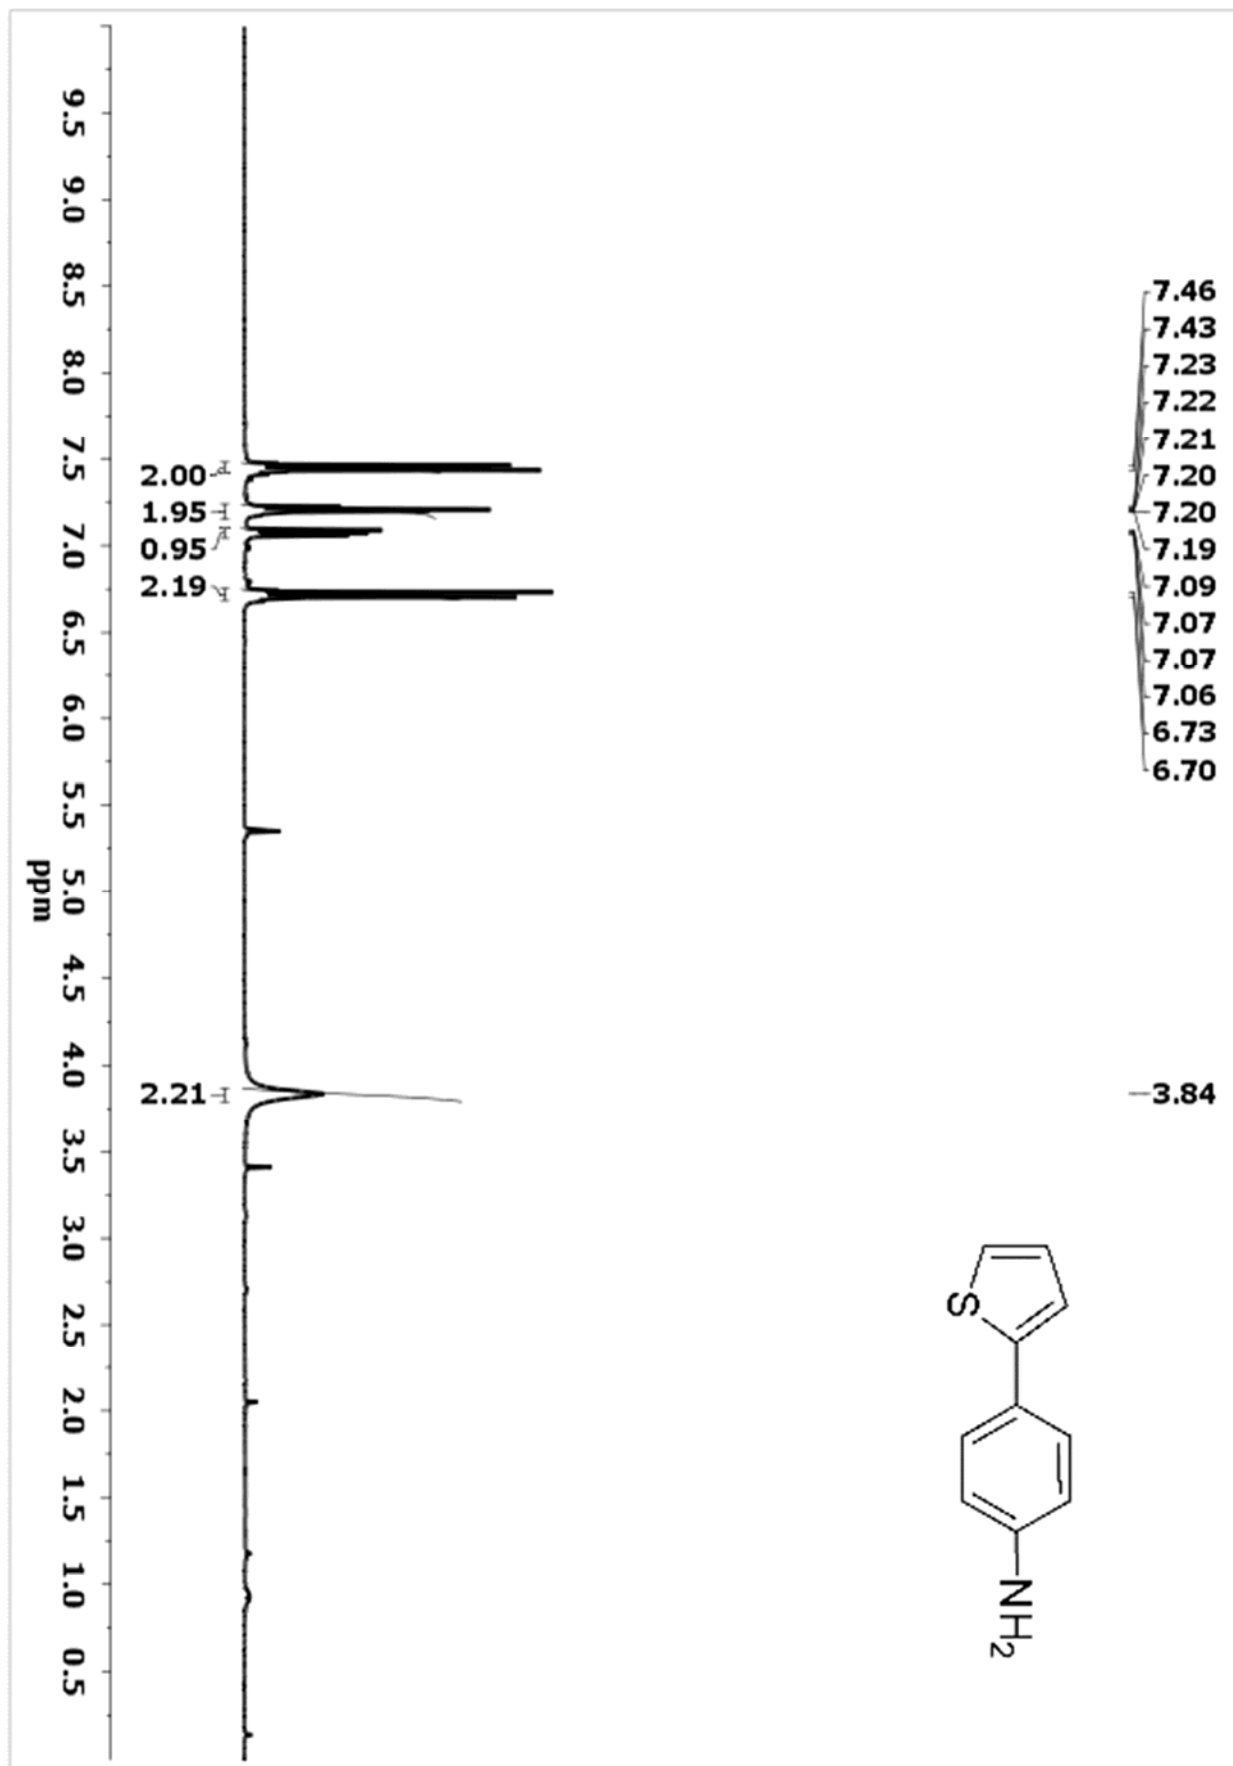

Figure S3:  $^1\text{H}$ -NMR spectrum of 4-(thien-2-yl)aniline (**2**) (200 MHz, DMSO- $d_6$ ).

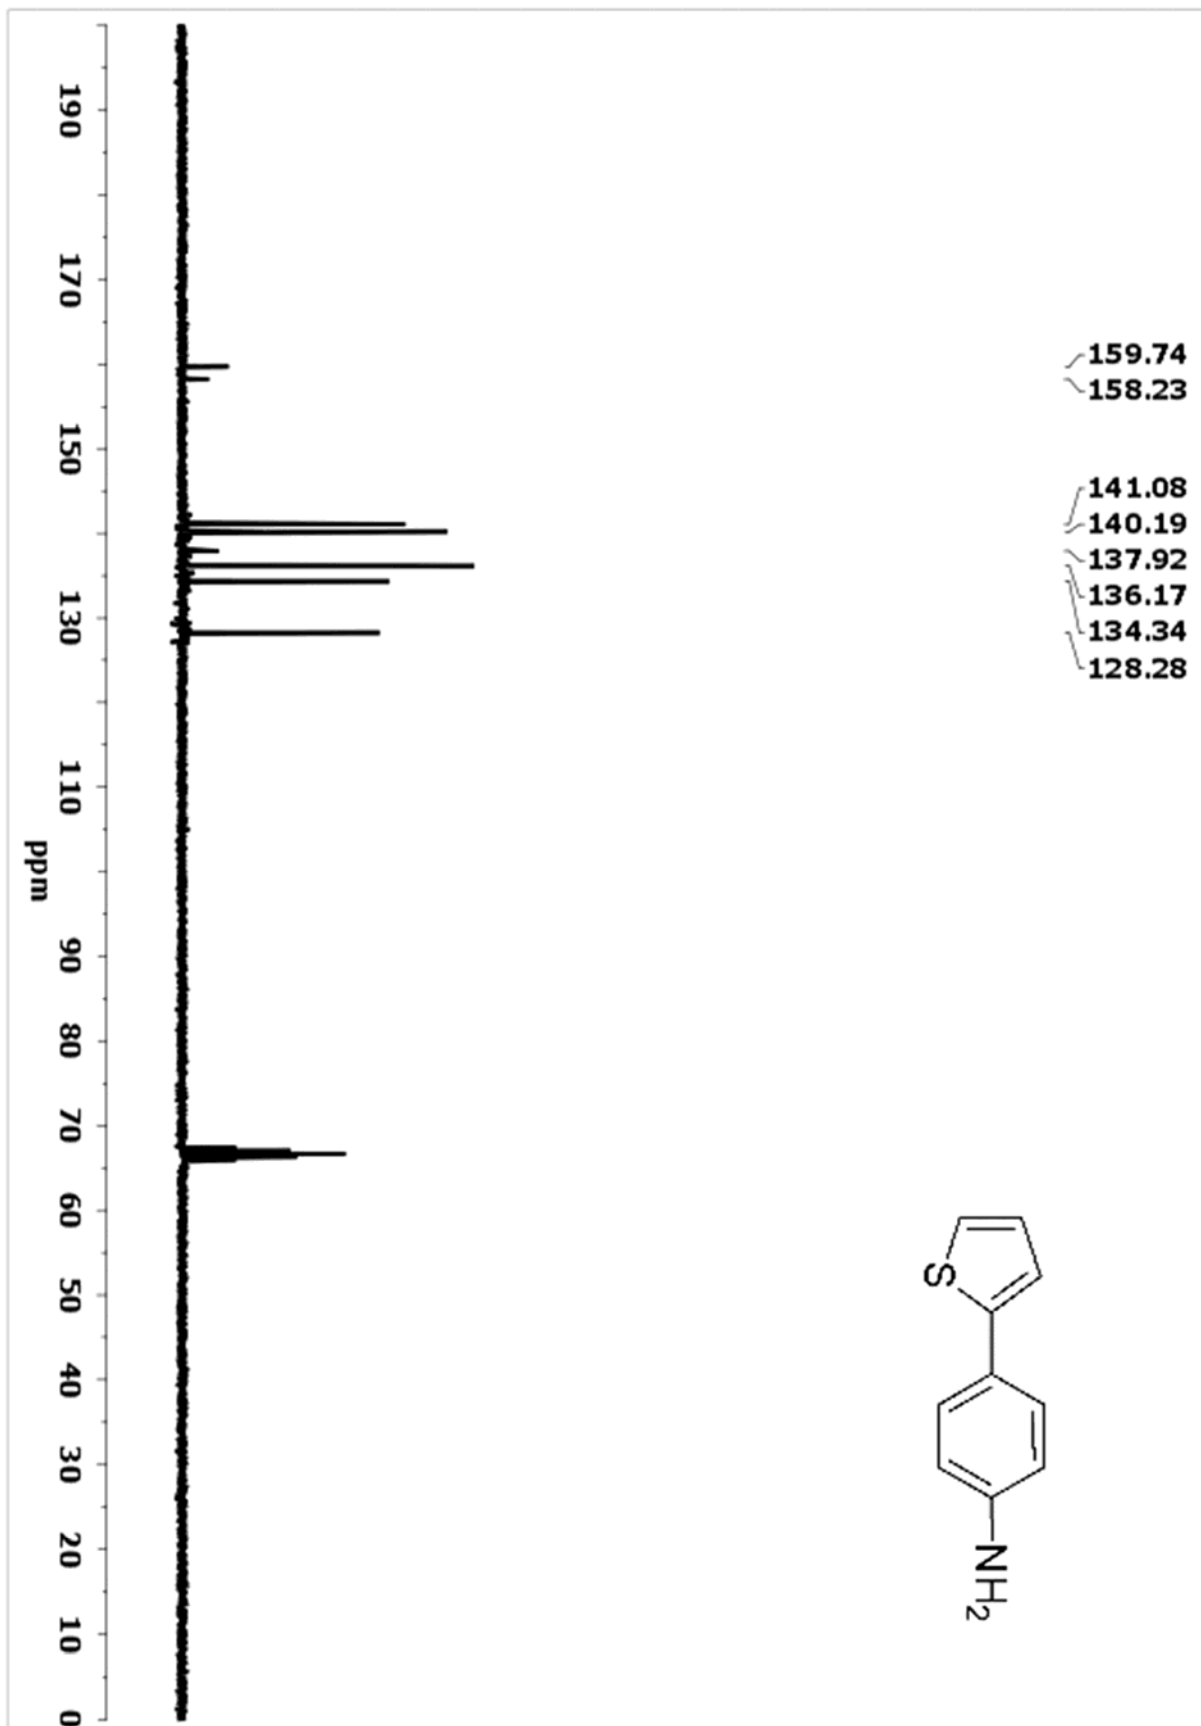

Figure S4:  $^{13}\text{C}$ -NMR spectrum of 4-(thien-2-yl)aniline (2) (50 MHz,  $\text{DMSO-d}_6$ ).

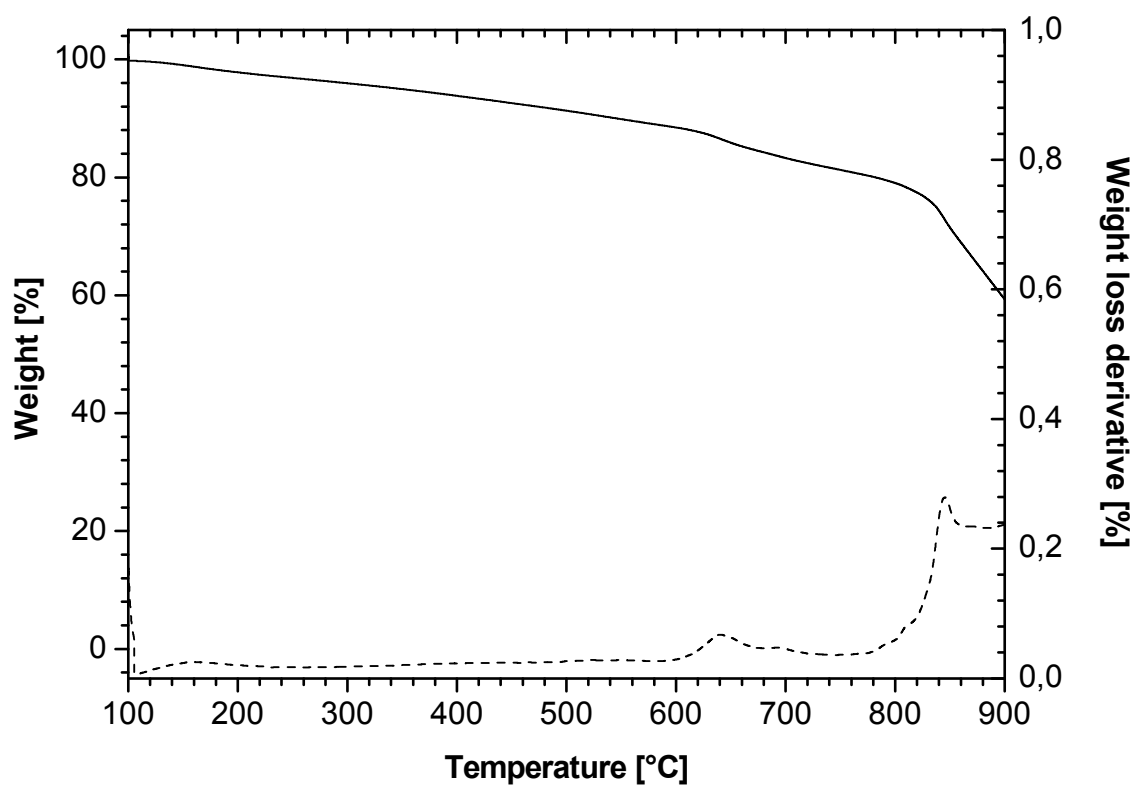

Figure S5: Thermogram of pristine SWCNTs (heating rate: 10 °C/min; atmosphere: nitrogen).

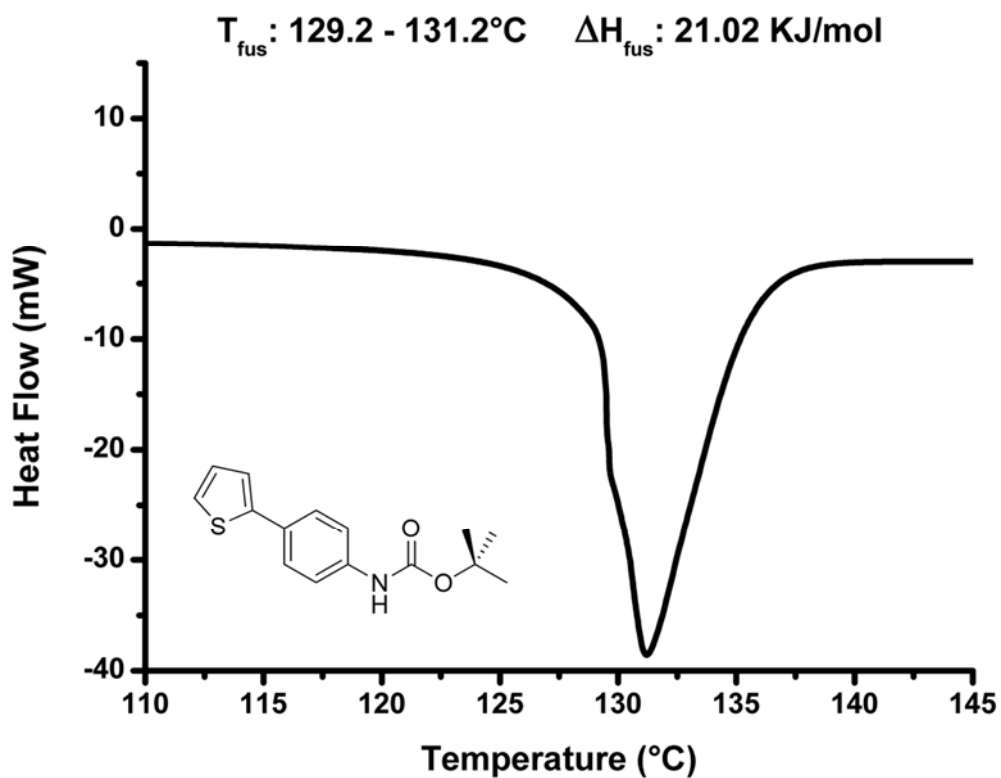

Figure S5: DSC thermogram of *tert*-butyl (4-(thiophen-2-yl)phenyl)carbamate (**1**) (1  $^{\circ}\text{C}/\text{min}$  under nitrogen).

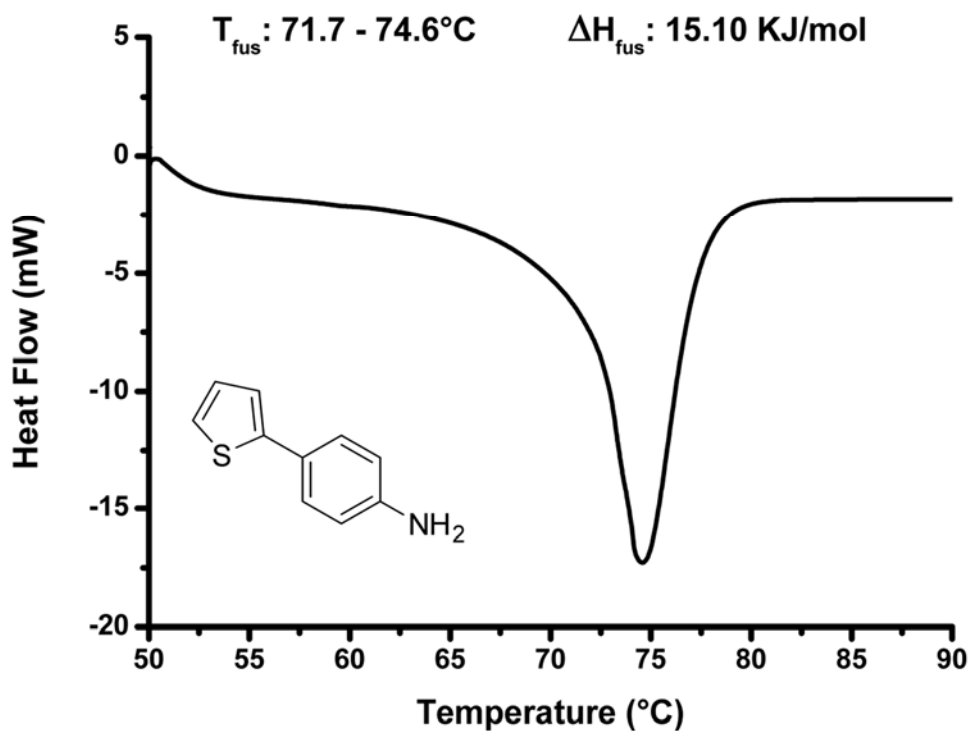

Figure S6: DSC thermogram of 4-(thien-2-yl)aniline (**2**) (1  $^{\circ}\text{C}/\text{min}$  under nitrogen).

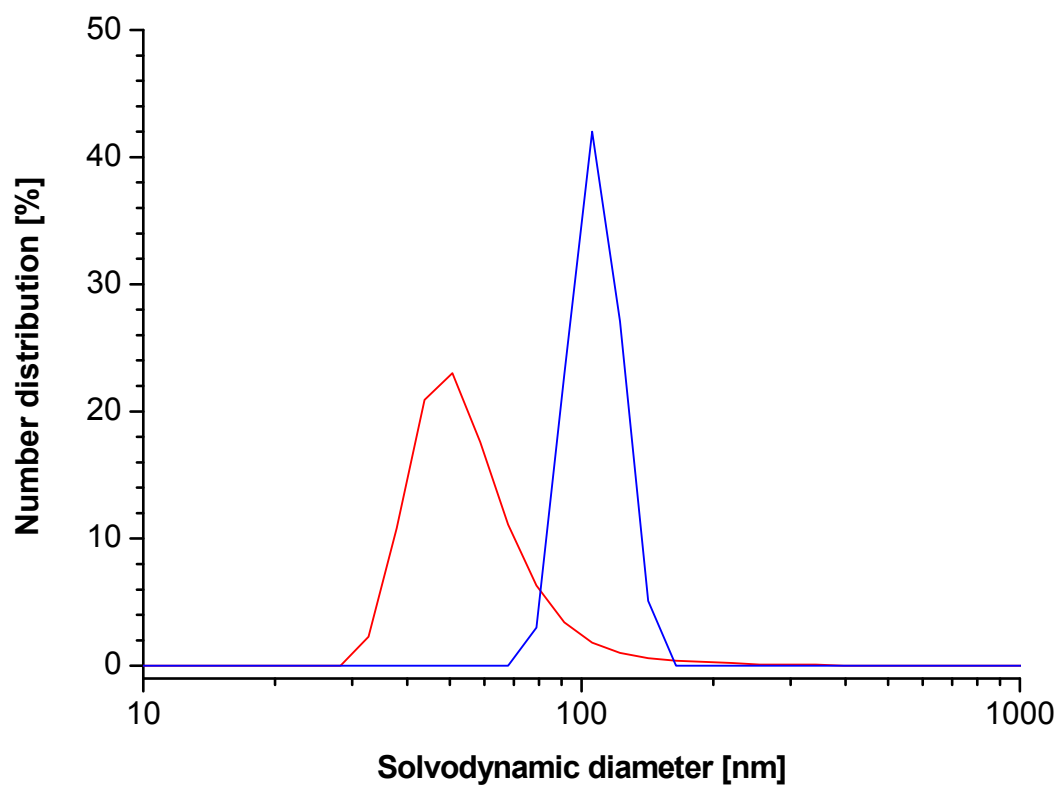

Figure S7: DLS analysis of SWCNT-PhTh prepared in batch (red line) and in flow (blue line) conditions.



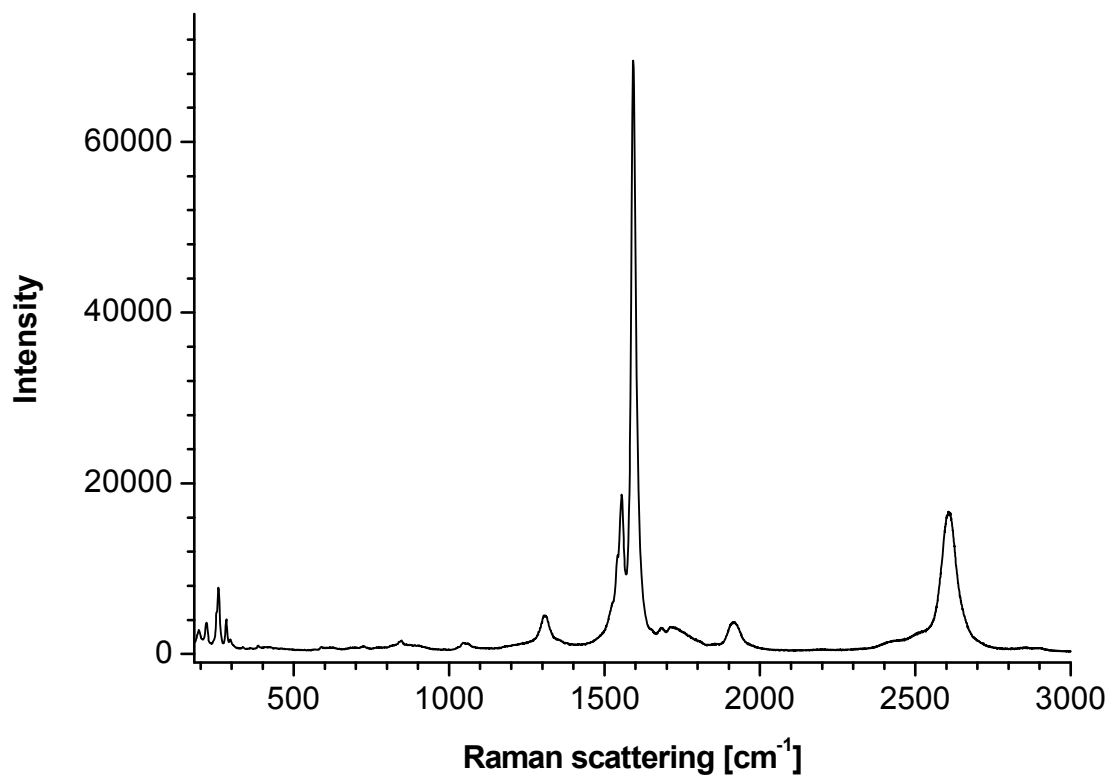

Figure S8: Raman spectrum of pristine SWCNTs (excitation: 633 nm).
